# Supplementary material for: Precocious centriole disengagement and centrosome fragmentation induced by mitotic delay
Source: PubMed Central journal article supplement (PMC5474744; doi:10.1038/ncomms15803), 2017-06-13
Supplement: ncomms15803-s1.pdf [file ncomms15803-s1.pdf]

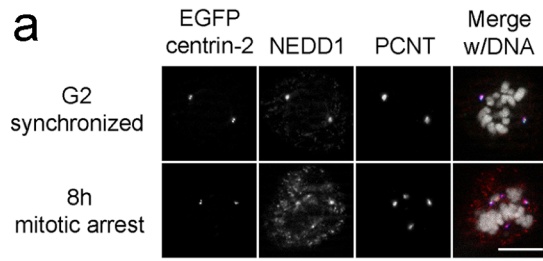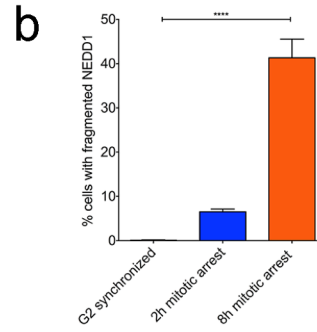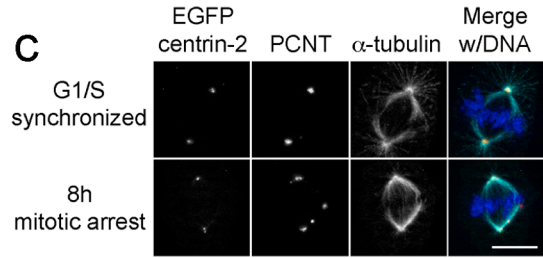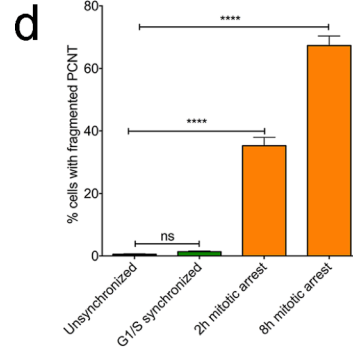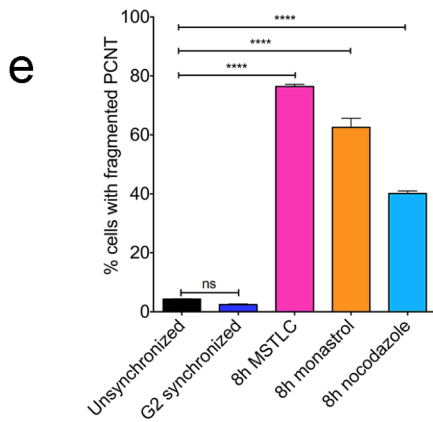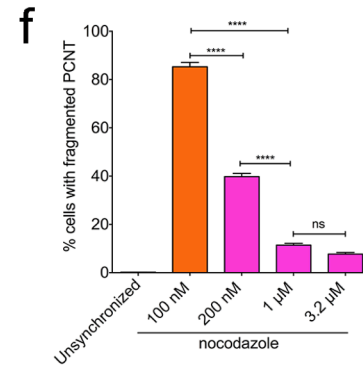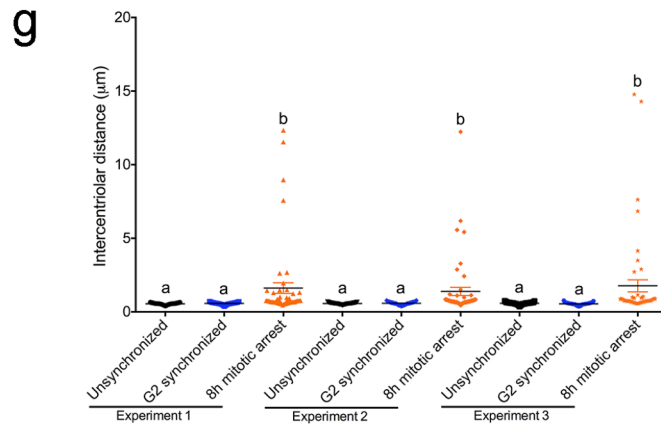

**Supplementary Figure 1. Related to Figure 1. Characterization of centrosome fragmentation in mitotically delayed RPE1 cells.**

(a) Cells transiently transfected with EGFP centrin-2 (Green), synchronized in G2 and then either released to proceed into mitosis (Top row) or arrested for 8 hours with monastrol prior to release (bottom row). Cells were fixed and then probed for NEDD1 (Red), pericentrin (PCNT, blue) and DNA (white). Bar, 10  $\mu$ m. (b) Quantification of NEDD1 fragmentation. (c and d) EGFP centrin-2 (Green)-expressing cells were synchronized using a double thymidine block, and then either released to proceed into mitosis (Top row) or arrested for 8 hours with monastrol prior to release (bottom row). Bar, 10  $\mu$ m. PCM Fragmentation occurred in mitotically delayed cells in a manner comparable to cells synchronized in G2 (Figure 1c). (e) Quantification of centrosome fragmentation observed following prometaphase arrest with different spindle antagonists (5  $\mu$ M MSTLC, 100  $\mu$ M monastrol, 200 nM nocodazole) or (f) increasing concentrations of nocodazole. For panels b,d,e and f, error bars represent SEM for three replicate experiments per condition, n=300 cells, per experiment, and significance was determined by one-way ANOVA with Tukey-Kramer post-hoc test, \*\*\*\*  $p \leq 0.0001$ . (g) Measurements of intercentriolar distances from three experimental replicates, of which experiment 2 is depicted in Figure 1d. For the individual experiments, significant differences were calculated for each comparison using a non-parametric Kruskal-Wallis test ( $p < 0.05$ ), and significant differences between samples were indicated with different lower case letters.

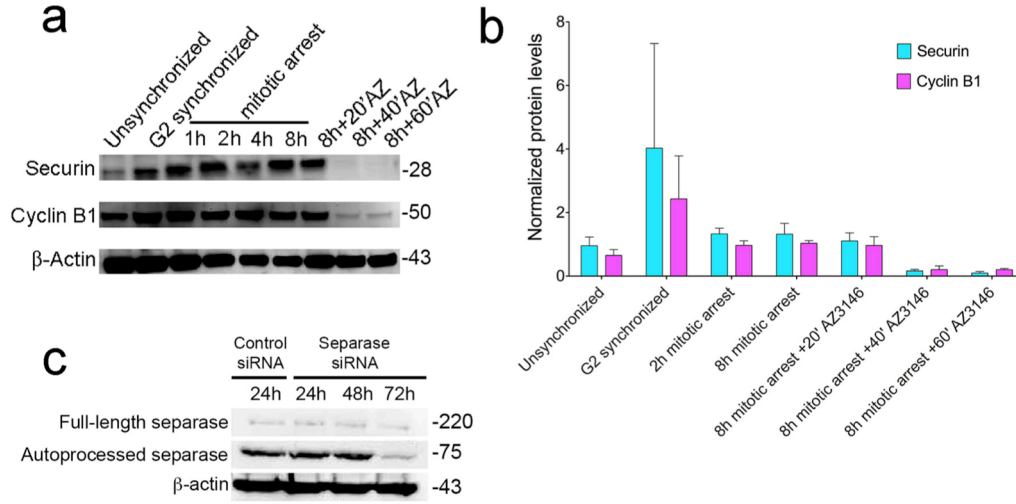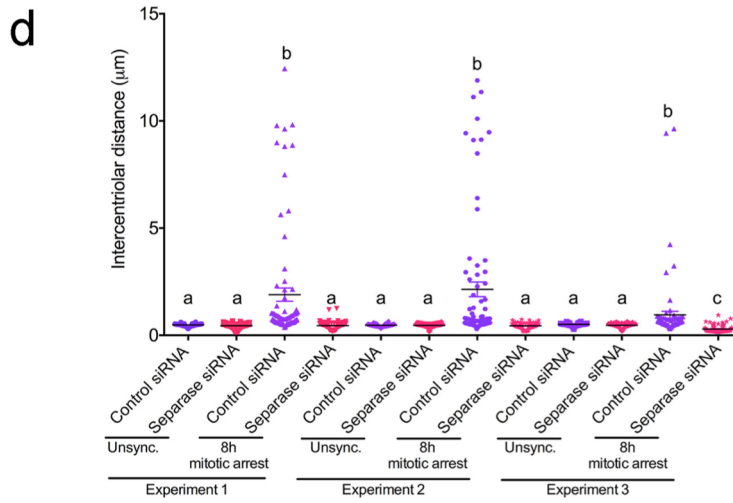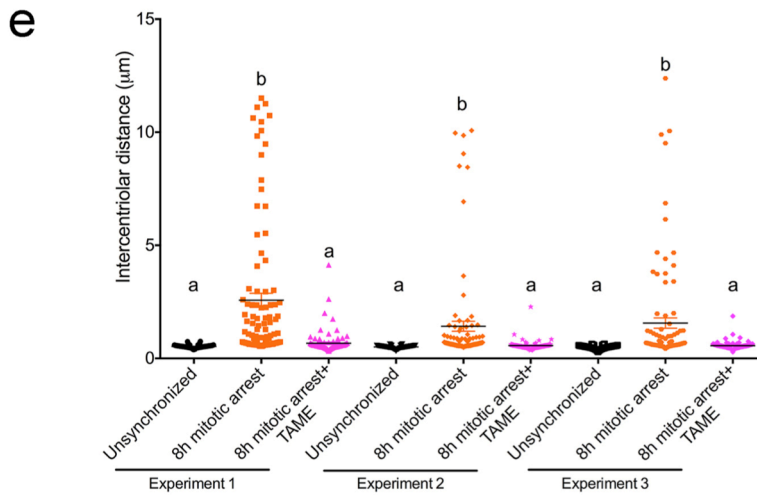

**Supplementary Figure 2. Related to Figure 3. Quantification of mitotic protein levels, separase depletion and intercentriolar distances.**

(a) Whole cell securin or cyclin B levels were detected in cells that were either unsynchronized, arrested in G2, or synchronized in G2 and then released into monastrol for varying amounts of time. As a positive control for APC/C- mediated degradation, cells arrested for 8 hours with monastrol were treated with the Mps1 inhibitor AZ3146 (10  $\mu$ M) for 20-60 minutes to allow for mitotic exit. (b) Quantification of the normalized protein levels, and error bars representing SEM for three replicate experiments. No significant differences were identified by one-way ANOVA with Tukey-Kramer post-hoc test. (c) RPE1 cells were transfected with control or separase siRNA for different time points and full-length and auto-processed forms of separase were detected by Western blotting. (d and e) Measurements of intercentriolar distances from three experimental replicates, of which experiment 2 is shown in Figure 3c and experiment 1 is shown in Figure 3f. For the individual experiments, significant differences were calculated for each comparison using a non-parametric Kruskal-Wallis test ( $p < 0.05$ ), and significant differences between samples were indicated with different lower case letters.

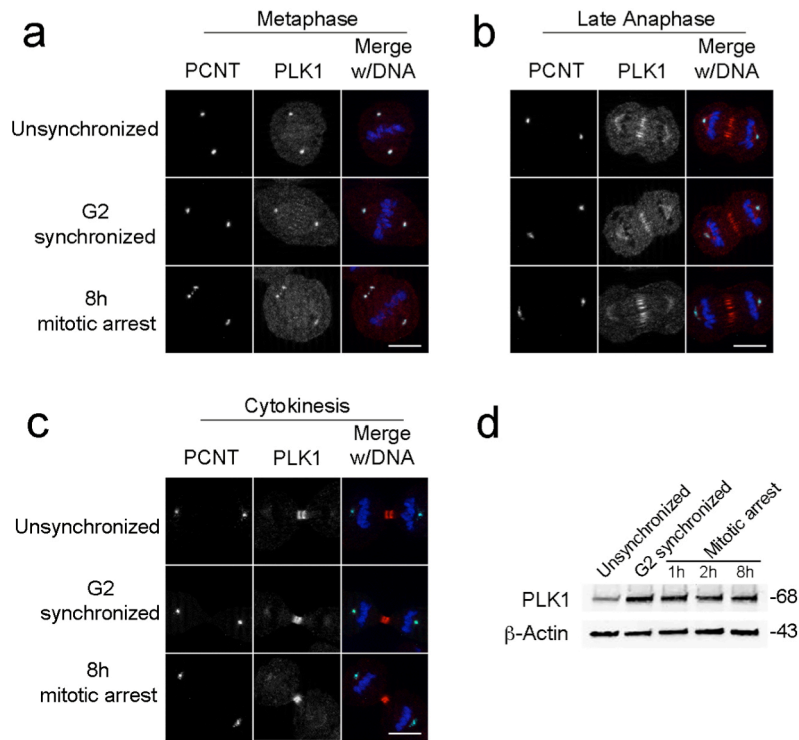

**Supplementary Figure 3. Plk1 localization and stability during mitotic arrest.** (a-c) G2-synchronized RPE1 cells were either allowed to directly progress into mitosis or were treated with monastrol for 8 hours before being released from prometaphase arrest to permit mitotic progression. Cells were fixed and then probed for PCNT (Cyan), PLK1 (Red) and DNA (blue). Bar, 10  $\mu$ m. (D) Protein samples were harvested from unsynchronized, G2-synchronized, or mitotically-delayed cultures, and probed for PLK1 and actin.

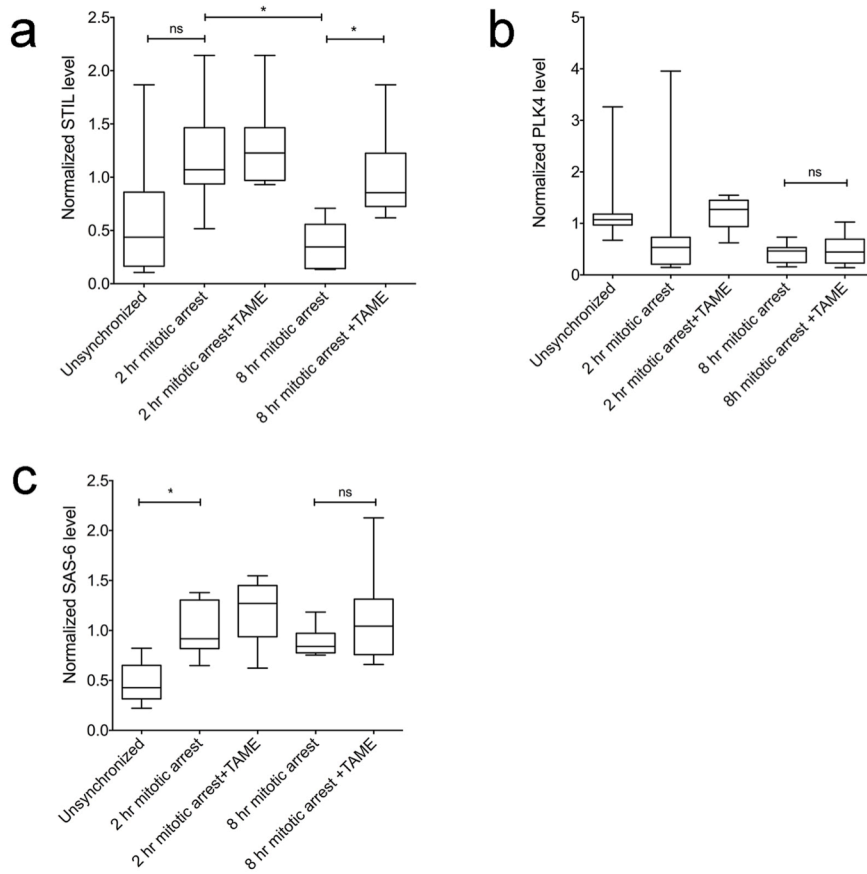

**Supplementary Figure 4. Related to Figure 4. Quantification of procentriole markers in cells delayed in mitosis.**

Quantification of normalized levels of STIL, PLK4 and SAS-6 for eight separate experiments as depicted in Figure 4. The upper and lower limits of the boxes demarcate the 25<sup>th</sup> and 75<sup>th</sup> quartiles, respectively, with the line denoting the median. Significance was determined by one-way ANOVA with Tukey-Kramer post-hoc test, \*  $p \leq 0.05$ .

Figure 4F

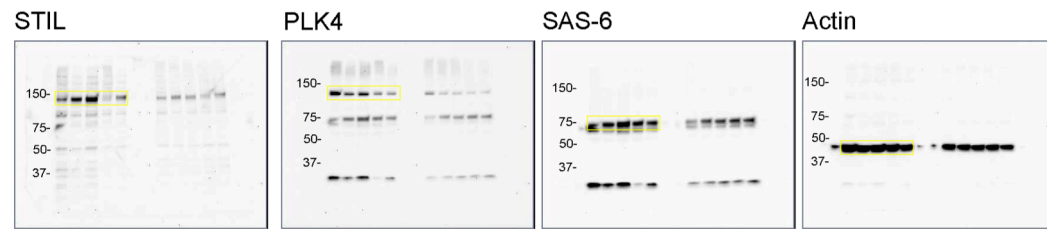

Figure S2A

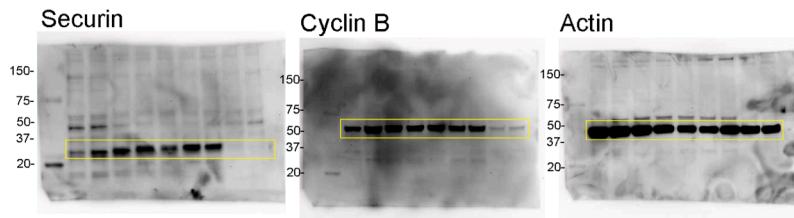

Figure S2C

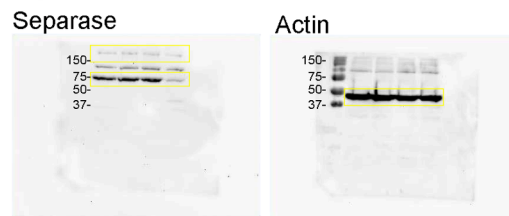

Figure S3

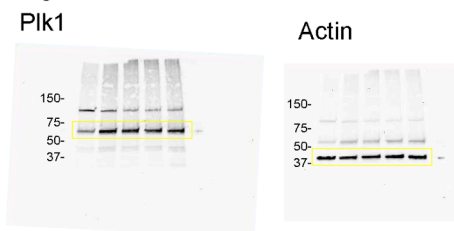

**Supplementary Figure 5. Uncropped images of Western blots for Figures 4, Supplementary Figure 2 and Supplementary Figure 3. Yellow boxes denote areas cropped for figure generation.**
